# Supplementary material for: Circumvention of common labelling artefacts using secondary nanobodies
Source: Royal Society of Chemistry journal article supplement (doi:10.1039/d0nr00227e), 2020-01-01
Supplement: d0nr00227e1.pdf [file d0nr00227e1.pdf]

## Supplementary Materials

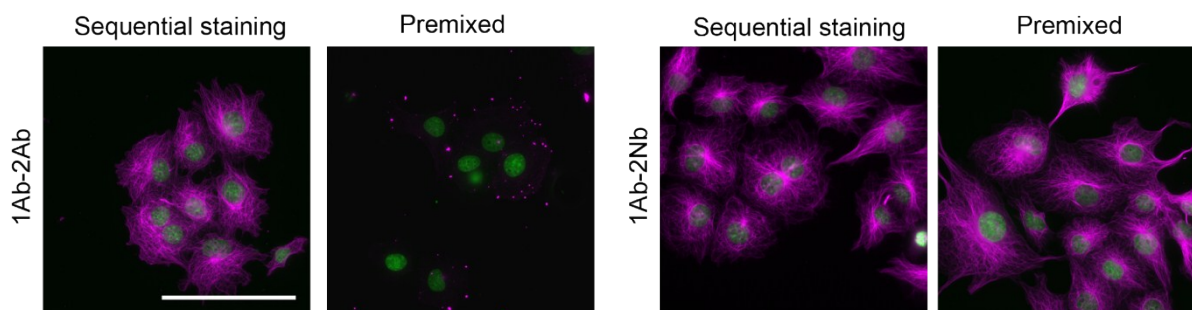

**Supplementary Figure 1:** Pre-mixing antibodies in a centrifuge tube prior incubation on the cell. Immunostaining is commonly done by sequential incubation of the primary probe and the secondary probe. Pre-mixing the two probe in a centrifuge tube prior incubation leads to no staining for 1.Ab-2.Ab while staining is maintained for 1.Ab-2.Nb. Hoechst staining (nucleus) in green, microtubule staining in magenta. Scale bar represents 50  $\mu$ m.

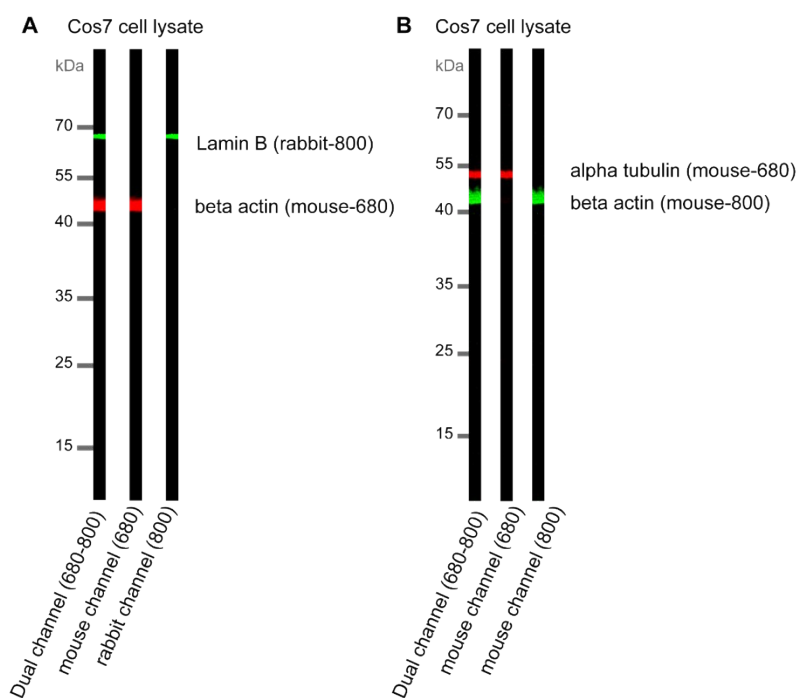

**Supplementary Figure 2:** Pre-mixing 1.Ab-2.Nb for Western Blot. COS-7 cell lysate blotted on nitrocellulose membrane. **A)** Pre-mixing allows shorter protocol by one single step staining. The membrane was stained with 1.Ab beta actin pre-mixed with 2.Nb anti Mouse coupled to IRDye680RD and 1.Ab anti Lamin B pre-mixed with 2.Nb anti Rabbit-IRDye800CW **B)** Pre-mixing allows use of same species antibodies in the same Western blot. The membrane was stained with 1.Ab beta actin pre-mixed with 2.Nb anti Mouse-IRDye800CW and 1.Ab anti alpha tubulin pre-mixed with 2.Nb anti Mouse-IRDye680RD.

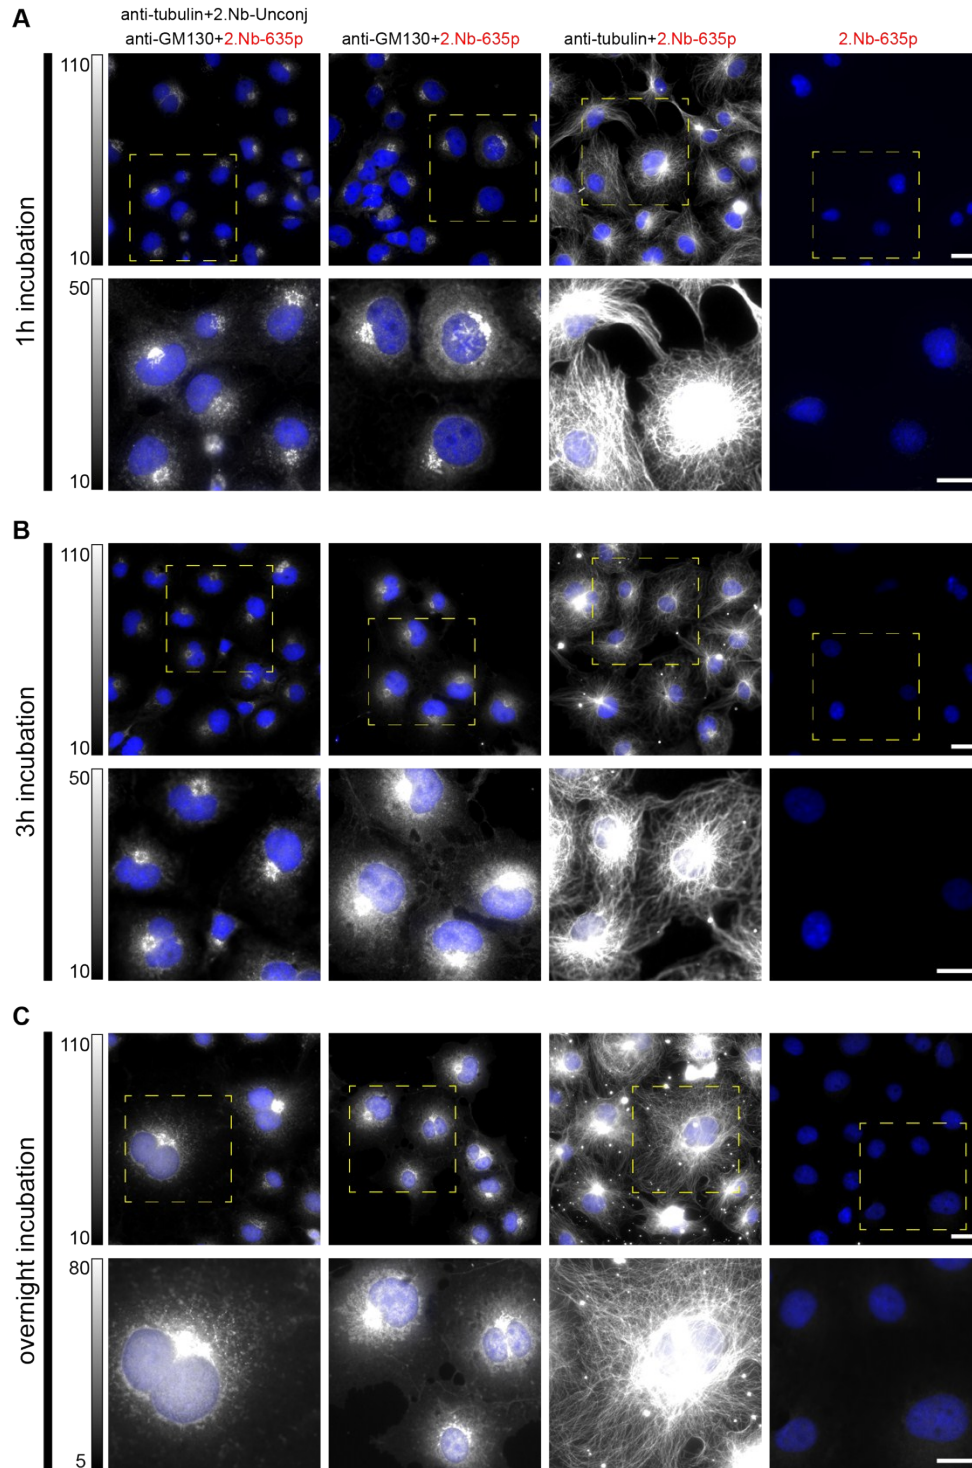

**Supplementary Figure 3.** Assessment of cross-contamination of 2.Nbs if pre-mixtures of same species are co-incubated on the sample simultaneously. **(A)** Top-left panel shows the epifluorescence images of COS-7 cells co-incubated for 1h at room temperature with the following pre-mixtures: anti-tubulin with unconjugated 2.Nb (2.Nb-Unconj), and anti-GM130 with 2.Nb-Star635p. The other top panels are controls. From left to right: anti-GM130 with 2.Nb-Star635p, without the anti-tubulin primary antibody; only anti-tubulin premixed with 2.Nb-Star635p; only the fluorescently labeled secondary nanobody (2.Nb-Star635p). The lower panels show the zoom areas depicted with dashed squares. Gray levels were equally set for all images (depicted with the gradient bar shown on the left). Scale bar for top and zoomed panels represents 20  $\mu\text{m}$ . **(B, C)** same as A, with pre-mixtures incubated for 3h and overnight (~16h), respectively.

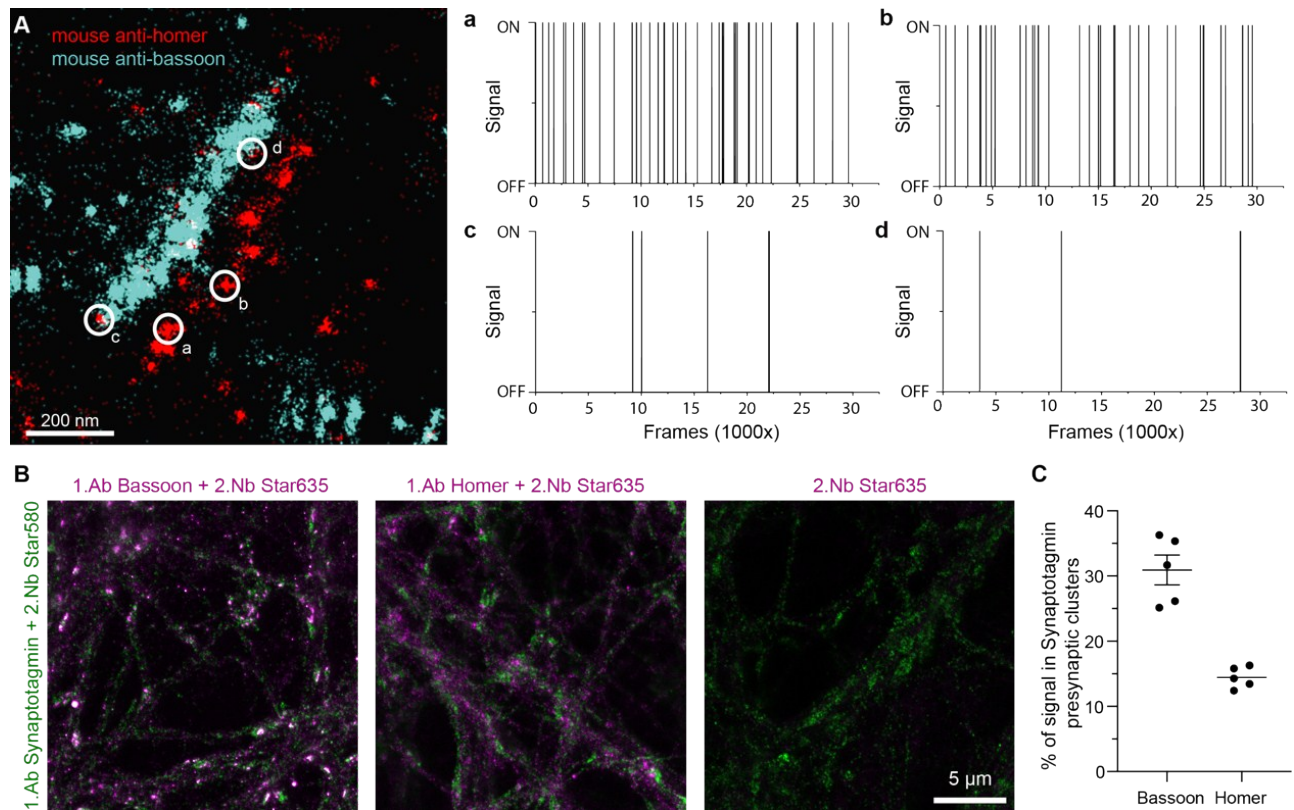

**Supplementary Figure 4.** The presence of homer signal in pre-synapses. **(A)** Example synapse taken from Fig. 3I. Analysis of homer DNA-PAINT localizations on the bassoon-rich localization area (pre-synapses) where the low frequency of visits by imager (shown in c & d) suggest that these “homer” localizations are non-specific events caused by the imager “stickiness”. In contrast, homer localizations on the post-synaptic area can be clearly attributed to specific and repeated annealing of imager to the docking DNA strand present on the 2.Nb (a & b). **(B)** 2-Color STED microscopy images of primary hippocampal neurons stained with a guinea pig anti-Synaptotagmin1 antibody (pre-synaptic marker found in synaptic vesicles) and the same anti-homer or anti-bassoon used for the DNA-PAINT in Fig. 3H. **(C)** An analysis of B suggests that a substantial fraction of the primary antibody anti-homer (post-synaptic marker) can be found within Syt1-marked pre-synapses. An average of  $\sim 14.45 \pm 1.6\%$  (mean  $\pm$  SD) of the homer signal is present there. Bassoon, which is a bona fide pre-synaptic protein, shows a stronger correlation to Syt1-marked synaptic vesicles, as expected. The graph displays the mean  $\pm$  sem with an N = 5.

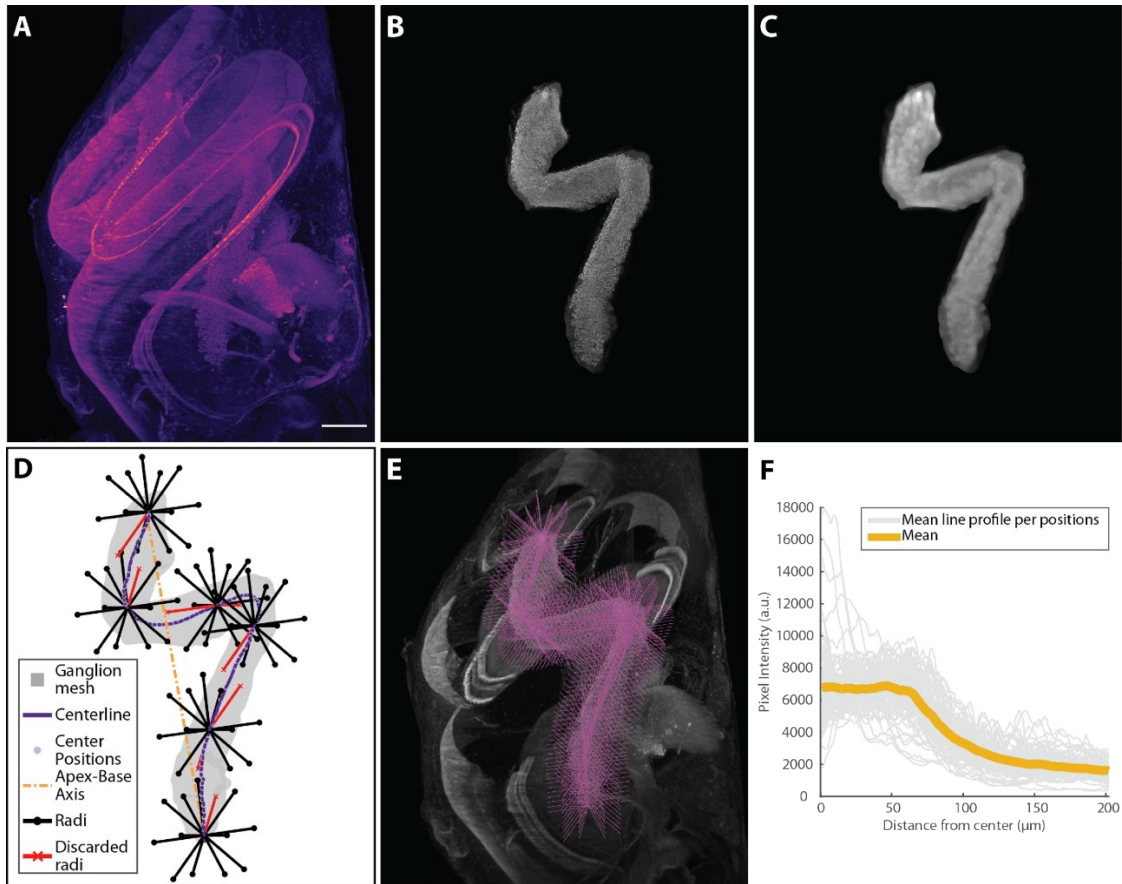

**Supplemental Figure 5.** Method to investigate the sample penetration of different labelling approaches in cochlear staining. **A)** Maximal intensity projection of a cleared cochlea stained with 1.Ab against parvalbumin- $\alpha$  premixed with 2.Nb anti-guinea pig. **B)** Coarse manual segmentation of the ganglion. **C)** Median filtered image of the ganglion (kernel: 10x10x1). **D)** 2D projection of the mesh created from a threshold segmentation of C), its centerline, the apex-base axis, the center positions where the radii fan out and the used and discarded radii. Only 6 out of the 100 center positions and their corresponding radii used are displayed for clarity. **E)** Maximal intensity projections of a sub-stack of the slices that contains only the ganglion. In magenta, all the radii mapped back in the image space. **F)** Mean line profile per position (n=100 positions) and mean line profile for this sample is plotted against the distance from the center position. Scale bars for A-C and E represent 200  $\mu\text{m}$  each.



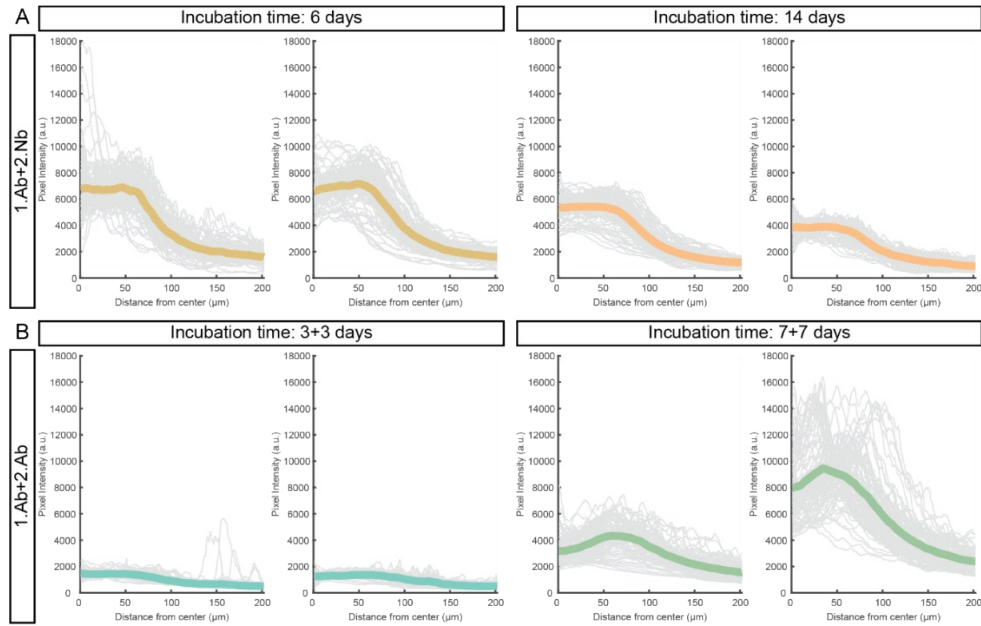

**Supplemental Figure 6. Line profile from individual cochlear samples.** Mean profile per position (n= 100 per sample, grey thin traces) and mean profile per sample (N=2 per staining method and incubation time, color thick traces) are displayed against distance from center position from **A)** Samples stained with a 1.Ab against parvalbumin- $\alpha$  premixed with 2.Nb against guinea pig, labeled with Alexa Fluor 546, and **B)** Samples stained with a 1.Ab against parvalbumin- $\alpha$  revealed by a 2.Ab against guinea pig, labeled with Alexa Fluor 568.

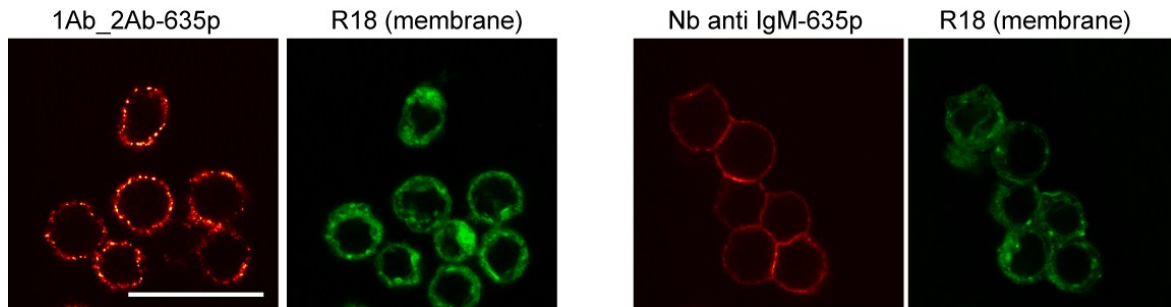

**Supplementary Figure 7:** Diffraction limited images (confocal microscope) of B cells stained with 1.Ab-2.Ab (left panel) or primary nanobody 1.Nb (right panel) targeting the IgM of the BCR receptor. In green a membrane staining is performed (R18) to show the integrity of the membrane. Scale bar represents 50  $\mu$ m

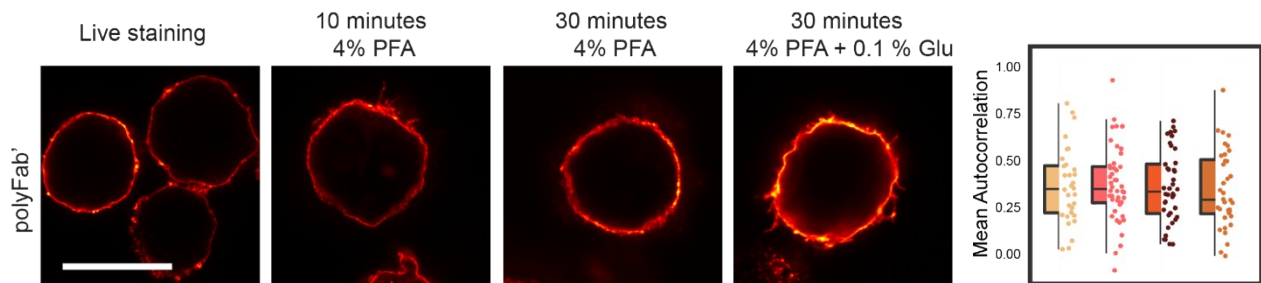

**Supplementary Figure 8:** B cells fixed in different conditions and subsequently stained with monovalent polyFab'. STED images and autocorrelation analysis as explained in Fig.5.

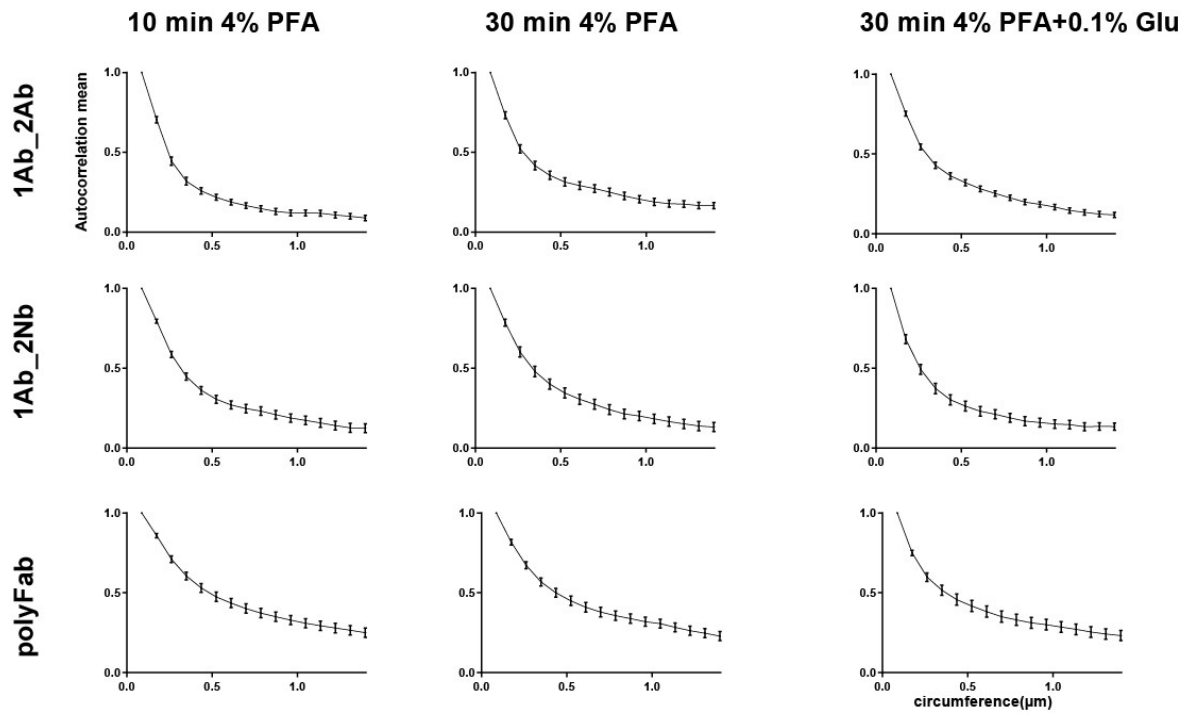

**Supplementary Figure 9:** Autocorrelation curve of B cells fixed prior staining with different fixation conditions. Selected images and analyses are in Fig.6 and Supp.Fig.6.

### Supplementary Table 1 | Antibodies

| Probe name                                                    | Company                                     | Catalogue number                     | Dilution used |
|---------------------------------------------------------------|---------------------------------------------|--------------------------------------|---------------|
| affibody® anti-IgM coupled to the Star635P                    | Abcam, Cambridge, UK                        | ab36088                              | 1:25          |
| Anti-IgM polyFab' coupled to the Star635P                     | Jackson ImmunoResearch, Cambridgeshire, UK  | cleaved with Papain from 109-006-129 | 1:50          |
| Monoclonal mouse anti-IgM                                     | Abcam, Cambridge, UK                        | ab193159                             | 1:200         |
| Secondary donkey anti-rabbit-Star635P                         | Abberior, Göttingen, Germany                | 2-0012-007-2                         | 1:200         |
| FluoTag-X2 anti-rabbit Star635P                               | NanoTag Biotechnology, Göttingen, Germany   | N1002-Ab635P                         | 1:50          |
| Monoclonal mouse anti-GM130                                   | BD bioscience                               | 610822                               | 1:62,5        |
| Monoclonal mouse anti-NPC                                     | Abcam, Cambridge, UK                        | ab24609                              | 1:200         |
| Mouse monoclonal anti-alpha tubulin                           | Synaptic Systems, Göttingen, Germany        | 302211                               | 1:500         |
| FluoTag-X2 anti-Mouse kLC CF633, Alexa488, Alexa546, Star635P | NanoTag Biotechnologies, Göttingen, Germany | N1202                                | 1:100         |
| Secondary donkey anti-mouse antibody                          | Jackson ImmunoResearch, Cambridgeshire, UK  | 715-005-151                          | 1:100         |
| Monoclonal mouse anti-beta actin                              | Sigma-Aldrich, Missouri, USA                | A1978                                | 1:100         |
| Polyclonal rabbit anti-Lamin B                                | Sigma-Aldrich, Missouri, USA                | HPA050524)                           | 1:100         |
| FluoTag-X2 anti-Mouse kLC LiCor800CW                          | NanoTag Biotechnologies, Göttingen, Germany | N1202-Li800                          | 1:500         |
| FluoTag-X2 anti-Mouse kLC LiCor680RD                          | NanoTag Biotechnologies, Göttingen, Germany | N1202-Li680                          | 1:500         |
| FluoTag-X2 anti-rabbit LiCor800CW                             | NanoTag Biotechnologies, Göttingen, Germany | N1202-Li800                          | 1:500         |
| Polyclonal Guinea Pig anti-Synaptotagmin1                     | Synaptic Systems, Göttingen, Germany        | 105105                               | 1:1000        |

### Supplementary Table 2 | Handle sequences

| Handle Name | Sequence        | 5'-mod | 3'-mod  | Company     |
|-------------|-----------------|--------|---------|-------------|
| P1          | TTATACATCTATTTT | Azide  | Atto488 | Biomers.net |
| P3          | TTTCTTCATTATTTT | Azide  | Atto488 | Biomers.net |
| P5          | TTTCAATGTATTTT  | Azide  | Atto488 | Biomers.net |

### Supplementary Table 3 | Imager sequences

| Imager name | Sequence   | 5'-mod | 3'-mod | Company           |
|-------------|------------|--------|--------|-------------------|
| P1*         | CTAGATGTAT | None   | Cy3b   | Eurofins Genomics |
| P3*         | GTAATGAAGA | None   | Cy3b   | Eurofins Genomics |
| P5*         | CATACATTGA | None   | Cy3b   | Eurofins Genomics |

### Supplementary Table 4| Imaging parameters

| Dataset                                    | Parameters                      | Power @561 nm        |
|--------------------------------------------|---------------------------------|----------------------|
| Figure 2: DNA-PAINT Microtubule with 2.Nbs | 200ms, 2D, 60k Frames, 2nM, P1* | 1 kW/cm <sup>2</sup> |
| Figure 2: DNA-PAINT Microtubule with 2.Abs | 200ms, 2D, 60k Frames, 2nM, P1* | 1kW/cm <sup>2</sup>  |
| Figure 3: bassoon                          | 150ms, 3D, 30k Frames, 3nM, P5* | 1 kW/cm <sup>2</sup> |
| Figure 3: homer                            | 150ms, 3D, 30k Frames, 6nM, P3* | 1 kW/cm <sup>2</sup> |

**Supplementary Table 5** | Statistics on BCR autocorrelation Analysis. One-way ANOVA with Tukey Multiple Comparison Test. ns= non-significant, \*=  $p \leq 0.05$ , \*\*=  $p \leq 0.01$ , \*\*\*=  $p \leq 0.001$ , \*\*\*\*=  $p \leq 0.0001$

|                            | polyFab live          | Affibody live                  | 1.Ab+2.Ab live                 | 1.Ab+2Nb live                            |
|----------------------------|-----------------------|--------------------------------|--------------------------------|------------------------------------------|
| <b>From Figure 5</b>       |                       |                                |                                |                                          |
| polyFab live               |                       | ns                             | ****                           | **                                       |
| Affibody live              |                       |                                | ****                           | ns                                       |
| 1.Ab+2.Ab live             |                       |                                |                                | ***                                      |
|                            | <b>1.Ab+2.Ab live</b> | <b>1.Ab+2.Ab 10 min 4% PFA</b> | <b>1.Ab+2.Ab 30 min 4% PFA</b> | <b>1.Ab+2.Ab 30 min 4% PFA+ 0.1% GLU</b> |
| <b>From Figure 6a</b>      |                       |                                |                                |                                          |
| 1.Ab+2.Ab live             |                       | ns                             | ***                            | ****                                     |
| 1.Ab+2.Ab 10 min 4% PFA    |                       |                                | *                              | ns                                       |
| 1.Ab+2.Ab 30 min 4% PFA    |                       |                                |                                | ns                                       |
|                            | <b>1.Ab+2Nb live</b>  | <b>1.Ab+2Nb 10 min 4% PFA</b>  | <b>1.Ab+2Nb 30 min 4% PFA</b>  | <b>1.Ab+2Nb 30 min 4% PFA+ 0.1% GLU</b>  |
| <b>From Figure 6b</b>      |                       |                                |                                |                                          |
| 1.Ab+2Nb live              |                       | ns                             | ns                             | ns                                       |
| 1.Ab+2Nb 10 min 4% PFA     |                       |                                | ns                             | ns                                       |
| 1.Ab+2Nb 30 min 4% PFA     |                       |                                |                                | ns                                       |
|                            | <b>polyFab live</b>   | <b>polyFab 10 min 4% PFA</b>   | <b>polyFab 30 min 4% PFA</b>   | <b>polyFab 30 min 4% PFA+ 0.1% GLU</b>   |
| <b>From Supp. Figure 8</b> |                       |                                |                                |                                          |
| polyFab live               |                       | ns                             | ns                             | ns                                       |
| polyFab 10 min 4% PFA      |                       |                                | ns                             | ns                                       |
| polyFab 30 min 4% PFA      |                       |                                |                                | ns                                       |
